# Supplementary material for: Highly exposed surface area of {001} facets dominated BiOBr nanosheets with enhanced visible light photocatalytic activity
Source: Royal Society of Chemistry journal article supplement (doi:10.1039/c5cp06711a), 2016-01-01
Supplement: c5cp06711a1.pdf [file c5cp06711a1.pdf]

## Supplementary data

### Highly Exposed Surface Area of {001} Facets Dominated BiOBr Nanosheets with Enhanced Visible Light Photocatalytic Activity

Fang Duan,<sup>ab</sup> Xiaofeng Wang,<sup>a</sup> Tingting Tan,<sup>a</sup> and Mingqing Chen<sup>\*ab</sup>

<sup>a</sup> School of Chemical and Material Engineering, Jiangnan University, Wuxi, Jiangsu 214122, PR China.

<sup>b</sup> The Key Laboratory of Food Colloids and Biotechnology, Ministry of Education, Jiangnan University, Wuxi, Jiangsu 214122, PR China

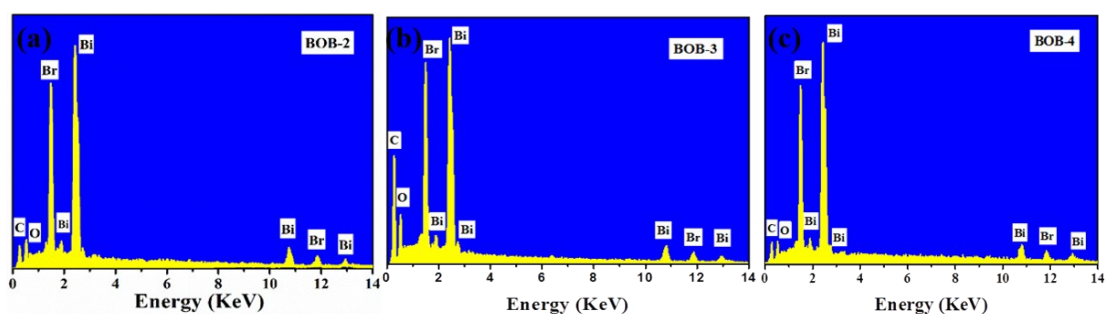

Fig. S1 The energy dispersive X-ray (EDX) spectroscopies of BOB-2, BOB-3 and BOB-4 samples

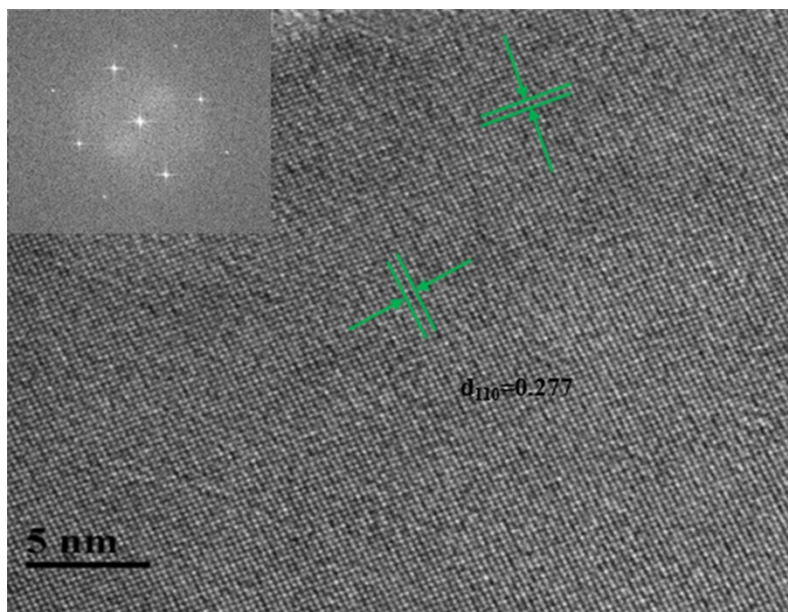

Fig. S2 HRTEM image and the corresponding fast Fourier transform pattern (FFT) of BOB-4 sample

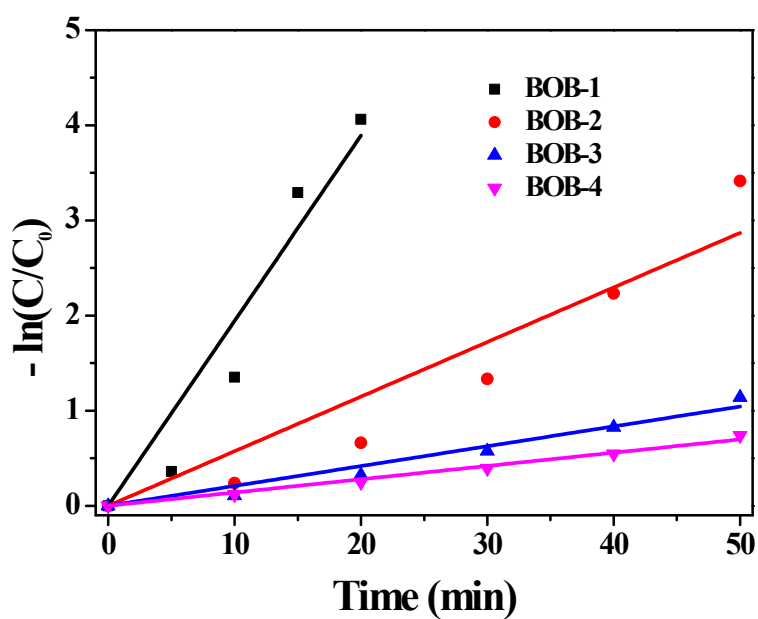

Fig. S3 Photodegradation of RhB over BiOBr samples with the pseudo-first order model.

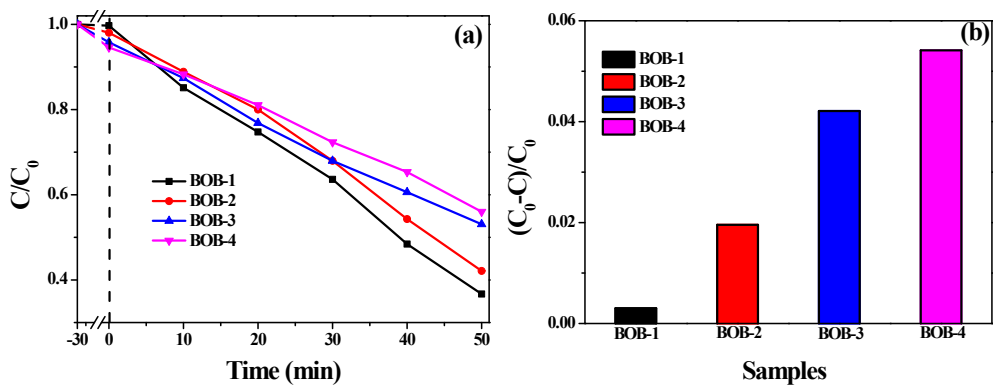

Fig. S4 (a) Photocatalytic degradation of MO (10 mg/L) solution over BOB-1, BOB-2, BOB-3, and BOB-4 samples under visible light irradiation, and (b) Adsorption capacity of MO on different BiOBr samples.

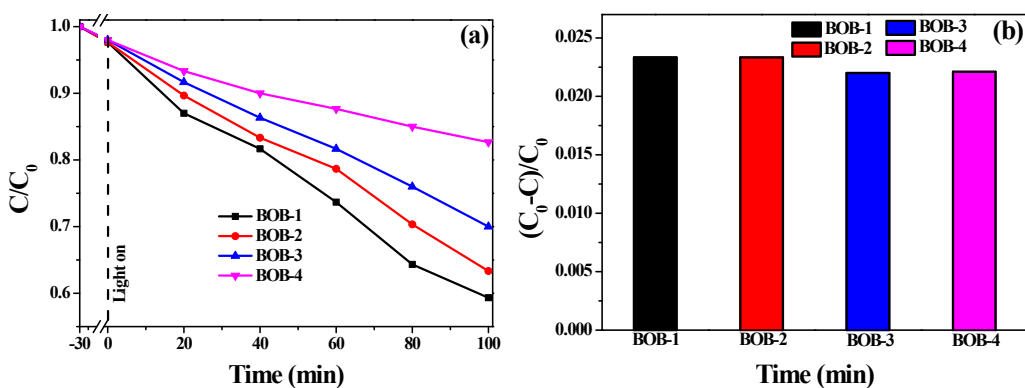

Fig. S5 (a) Photocatalytic degradation of phenol (10 mg/L) over BOB-1, BOB-2, BOB-3, and BOB-4 samples under visible light irradiation, and (b) Adsorption capacity of phenol on different BiOBr samples.

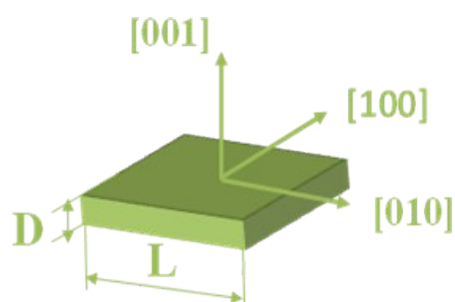

Scheme S1 Schematic illustration of BiOBr nanosheets.

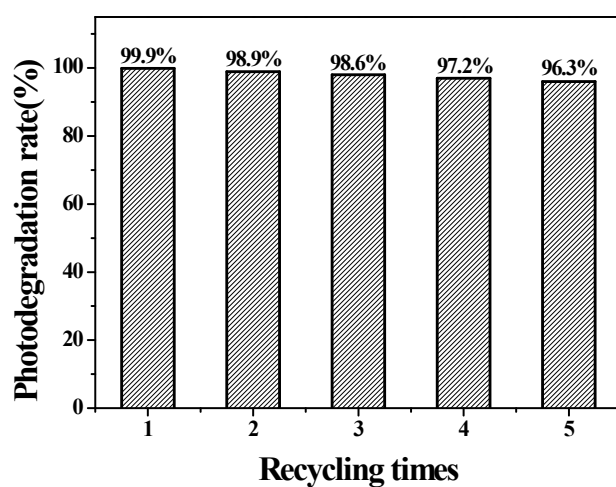

Fig. S6 Cycling runs of photocatalytic degradation of Rh B by BOB-4 sample.

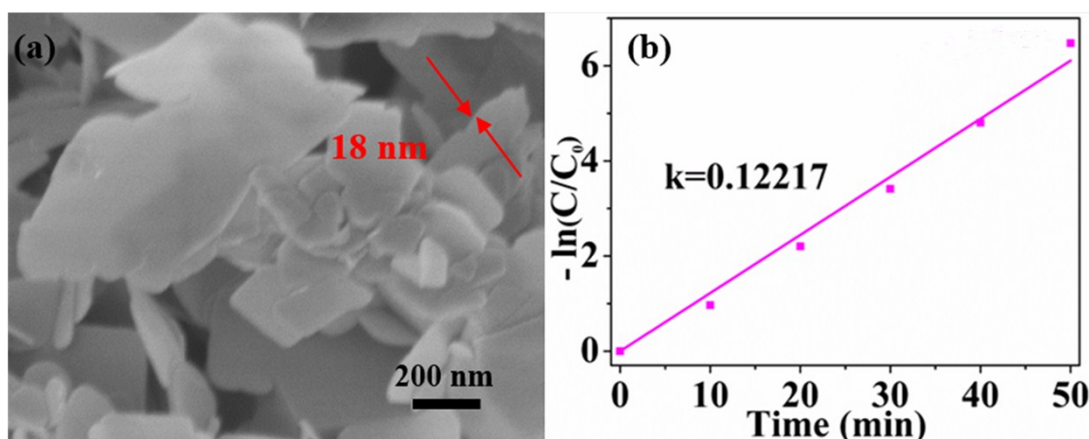

Fig. S7 The thickness of BOB-7 sample estimated from SEM image and the pseudo-first-order rate constant  $k$ .

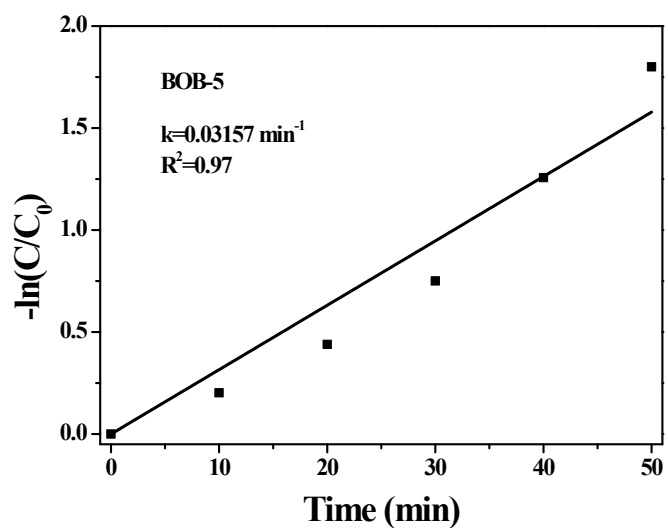

Fig. S8 Photodegradation of RhB over BOB-5 sample with the pseudo-first order model fitting result

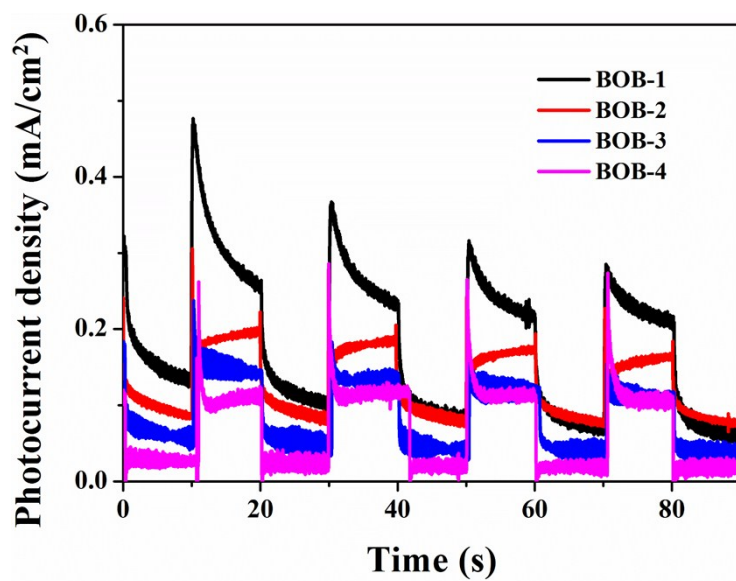

Fig. S9 Photocurrent responses of the BiOBr samples
